# Supplementary material
Source: PubMed Central journal article supplement (PMC4995898)
Supplement: IAI.00377-16_zii999091816so1.pdf [file IAI.00377-16_zii999091816so1.pdf]

## Supplemental Information

1

2 **Supplemental Figure S1.** Data from Figure 1C&D were plotted as average values with standard  
3 deviation similar to data representations elsewhere in the text. See legend of Figure 1 for more  
4 information.

5 **Supplemental Figure S2.** Comparison of transcript levels of selected genes between untreated and  
6 IFN $\gamma$ -treated Cpn at 24hpi. Samples were collected and analyzed as described in the legend of Figure  
7 1.

8 **Supplemental Table 1.** A list of primer sets used in the study for qPCR.

9 **Supplemental Table 2.** Codon content analysis of Cpn microarray data.

10

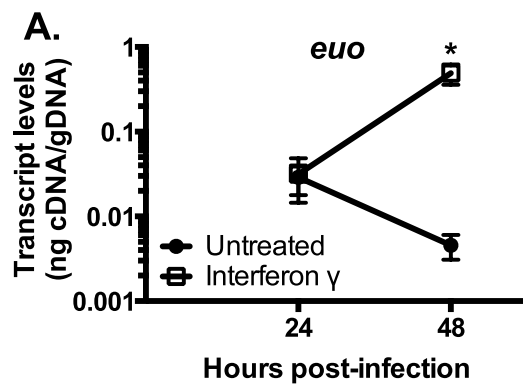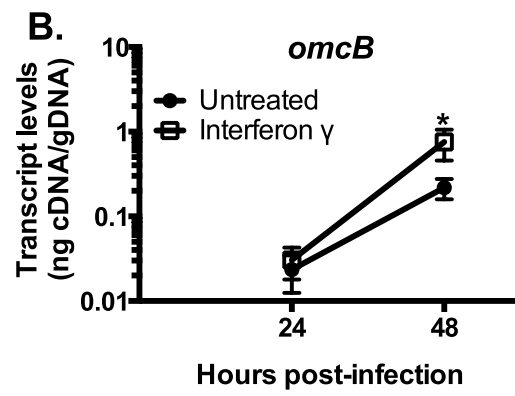

Supplementary Figure 1

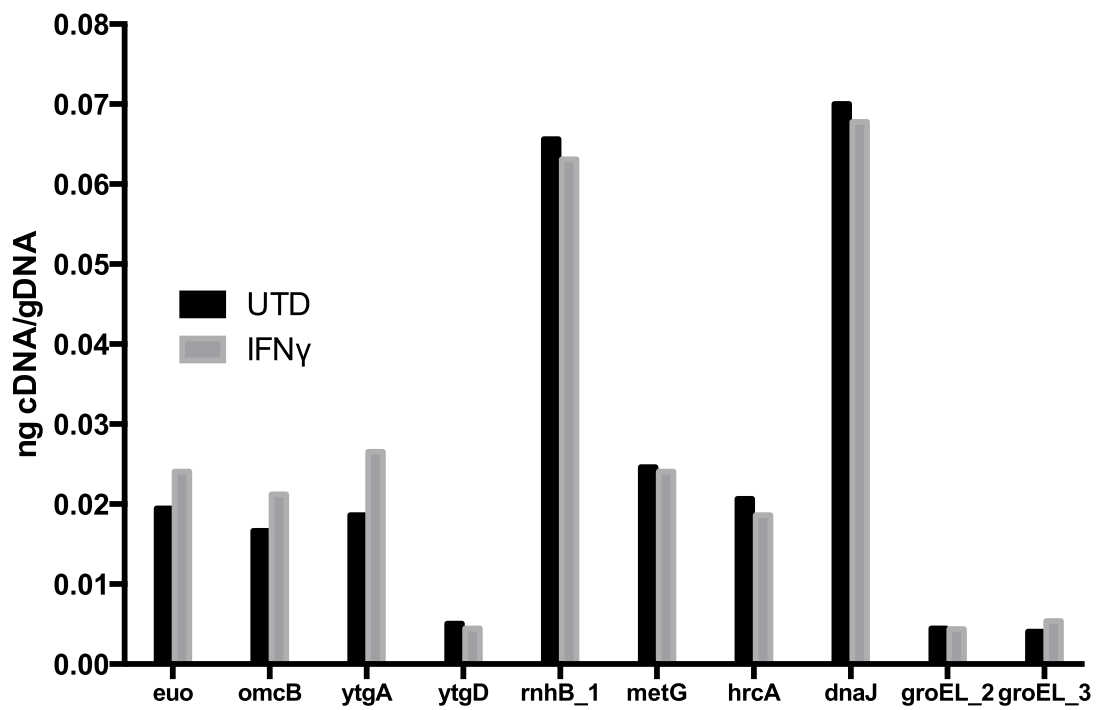

**Supplementary Figure 2**

Supplemental Table 1. List of Primers Used in Study.

| <u>Gene</u>            | <u>Forward Sequence</u>           | <u>Reverse Sequence</u>         | <u>Notes</u>                 |
|------------------------|-----------------------------------|---------------------------------|------------------------------|
| <i>Cpn0561/euo</i>     | GGA ATA CCT GTG CAG AAG GTC TAC T | CCC AAG CGG CTC CCT TAC         | Early gene                   |
| <i>Cpn0557/omcB</i>    | CTG GAG ACT TGG TTC TTC ATG ATG   | CCA CCA GGA GCT TCG AGT ACT G   | Late gene                    |
| <i>Cpn0850/mreB</i>    | GAT TGC TGA GGG CAT GTT AAA G     | CCA GTA ATC CCA GAA GGA ACA G   | 0W                           |
| <i>Cpn0534/dksA</i>    | GGG AAC GCT CAA GAG GTA AA        | CTA GGC TAA TAG TCC GAT CAA AGG | 0W                           |
| <i>Cpn0316/nusA</i>    | CAG TCG TAG TCA CGC AGA AT        | CCA GCT TCA CGA GCT ATC TT      | 0W                           |
| <i>Cpn0610/rho</i>     | CTG ATA GGT GAA GGC GTG TTA G     | CGA ATC TGA GCT GGA GAA ACA     | 0W                           |
| <i>Cpn1069/rodZ</i>    | GCT CAT CAC GAG AGT CTC AAT C     | CCC TGA GCA TAA ACT GGA GAA A   | Upstream of all 5W residues  |
| <i>Cpn0265/ubiA</i>    | TGC AAG GAC TAC GGG AAT TG        | ACA AGA TTC GCA GGA AGG AC      | Upstream of all 5W residues  |
| <i>Cpn0076/nusG</i>    | ATC TGG CCT GGA TAC CTC TTA       | GCC TCC AAG AAA CTC GAC TAT AC  | Downstream of 2W/4W          |
| <i>Cpn0544/obg</i>     | GGT CAG TCA GGA GCT ACA AAT AA    | TTC ACC AGT CTC AGC ATC AC      | Downstream of 1W/2W          |
| <i>Cpn0134/groEL_1</i> | TCC AGC TAC TTC TCC ACA AAT C     | GCG TCC AGA TTC TGC TAC TT      | 0W                           |
| <i>Cpn0777/groEL_2</i> | TGG ATG TTG TGT GGG AAG AAG       | GGG TGT TCT GTT CAG AGA TGA G   | Downstream of 2W/2W          |
| <i>Cpn0898/groEL_3</i> | GCG CGA CTA CTG GAC TTA TTT       | TGA GCT TGT GTG TGG AGA TTC     | Upstream of single W residue |
| <i>Cpn0520/clpP_1</i>  | TAA CCT CAC CCG TCA CTA CT        | CTT CCA GGA GCT GCA CAT AA      | Downstream of 2W/3W          |
| <i>Cpn0847/clpP_2</i>  | CCA TGG GAG CCC TCT TAT TAT C     | GTT CCG ATA ATG CCT CCA GAA     | 0W                           |
| <i>Cpn0511/rsbV_1</i>  | CTC ACC TCG ATT ACA TGT CCA G     | TCC CAG AAT GTT GTC CTA CTT G   | 0W                           |
| <i>Cpn0909/rsbV_2</i>  | CTC AGT GCC TAG TGT TCA AGA G     | GAA TCC CTG CGC TAC TGA TAT AC  | 0W                           |
| <i>Cpn0503/dnaK</i>    | AAA CGT CAA GCA GTG ACA AAT C     | AGA TCC GGA GGT GAC TGT ATA A   | 0W                           |
| <i>Cpn0501/hrcA</i>    | GAA TCC CTA CAG ACC TAG CAT TAC   | GCT AGG AAG CTG ACT GAT CTT ATC | 0W                           |
| <i>Cpn0032/dnaJ</i>    | TCT GGT CAA GGA GCT GTA AAC       | CAT GTA GAG GCC ATG GAG AAA     | 0W                           |
| <i>Cpn0349/ytgA</i>    | GGA TGC AAA TTC ACG TCC TTG T     | CAG CGG TAG CAA GCC TAT T       | 6W                           |
| <i>Cpn0346/ytgD</i>    | GCG AAT GCT GTC TCT CAT ACT       | CAA GAG TCA AGG TAC CCA AAG A   | 1W                           |
| <i>Cpn0119/rnhB_1</i>  | CGT AGT TGC TAG TGC CTG TAT       | GAA CTT GGG CTC GTT GTT TAG     | 0W                           |
| <i>Cpn0122/metG 5'</i> | CCA ACT TAA AGC GTC TGG ATT G     | GGA CAC GTC CCT TCT ACA TAA C   | Upstream of all 8W residues  |
| <i>Cpn0122/metG 3'</i> | CGT AAG GCT ACG AGT GTG ATT AT    | TCA CGA GTC CCT TCT TTC AAT AG  | Downstream of 5W/8W          |
| <i>Cpn0741/greA 5'</i> | TCA GCA GAA GGT GTT GAT AGA G     | CCG TCG TGA AAG GAA GTG AT      | Downstream of 3W/11W         |
| <i>Cpn0741/greA 3'</i> | GCT GTG CGT CAG ATG ATA GAA       | CGG GCA TTT GGT GGA TAG TAA     | Downstream of 8W/11W         |
